# Supplementary material
Source: PubMed Central journal article supplement (PMC6902421)
Supplement: NIHMS515812-supplement-Suppmat_1.pdf [file NIHMS515812-supplement-Suppmat_1.pdf]

# European Journal of Immunology

**Supporting Information**

**for**

**DOI 10.1002/eji.201041105**

**Alternative activation of macrophages by IL-4 requires SHIP degradation**

Shelley B. Weisser, Keith W. McLarren, Nicole Voglmaier,

Christina J. van Netten-Thomas, Andrey Antov, Richard A. Flavell and Laura M. Sly

Supplemental Table 1. Molecular weights (kDa) of proteins detected in Western blot analyses.

| <b>Protein</b> | <b>Molecular weight(s) (kDa)</b> |
|----------------|----------------------------------|
| SHIP           | 145, 135, 125, 110               |
| SHIP2          | 145                              |
| pSTAT6         | 105, 89                          |
| PTEN           | 55                               |
| Shc            | 52, 46                           |
| Ym1            | 45                               |
| arginase I     | 38, 36.5                         |
| GAPDH          | 35                               |

**Supplemental Table 1**

**Weisser *et al.*, 2010**

Supplemental Table 2. IC<sub>50</sub> (μM) values of the p110 isoform-specific PI3K inhibitors against pure p110 enzymes.

| Inhibitor | Abbreviation | IC <sub>50</sub> (μM) |       |       |       |
|-----------|--------------|-----------------------|-------|-------|-------|
|           |              | p110α                 | p110β | p110δ | p110γ |
| PIK-90    | α            | 0.011                 | 0.35  | 0.058 | 0.018 |
| TGX-221   | β            | 5.0                   | 0.005 | 0.1   | >10.0 |
| SW18      | δA           | 6.7                   | 2.4   | 0.005 | 0.038 |
| SW30      | δB           | 85                    | 0.74  | 0.007 | 1.3   |
| SW14      | δC           | 8.9                   | 0.697 | 0.009 | 0.021 |
| AS605240  | γ            | 0.06                  | 0.27  | 0.3   | 0.008 |

\*The IC<sub>50</sub> values using intact cells are 10-100 times higher [35].

**Supplemental Table 2**

**Weisser *et al.*, 2010**

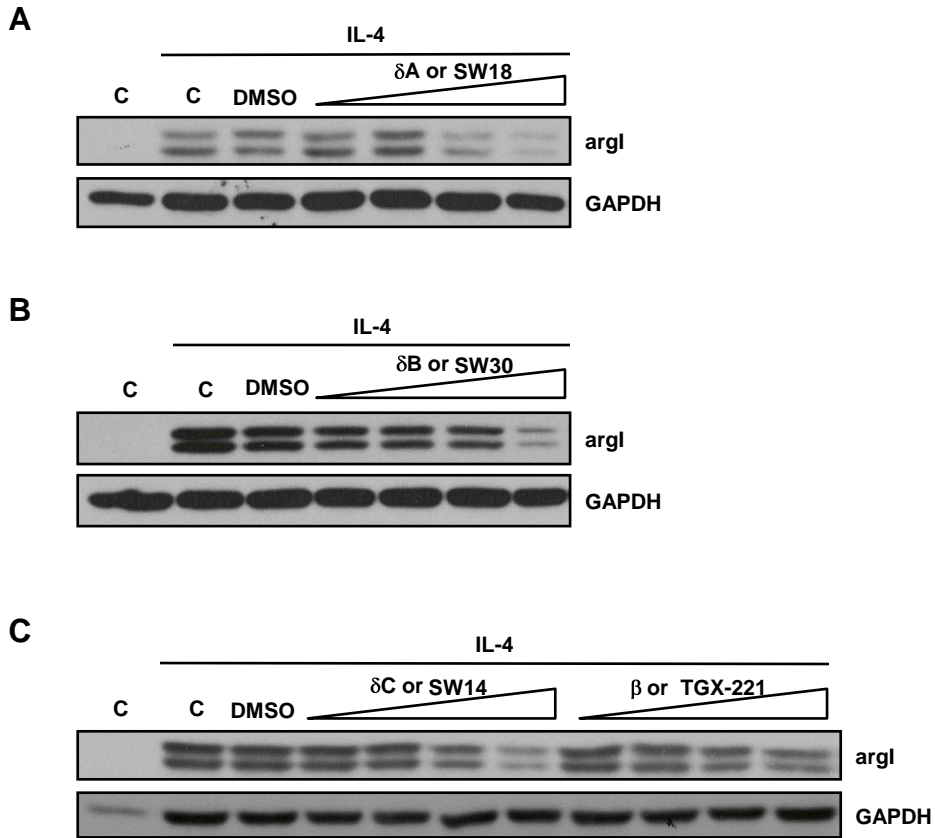

Supplemental Figure 1. Titrations of the PI3Kp110 isoform specific inhibitors that were effective at reducing argl expression. BMmΦs were untreated (C) or pre-treated with vehicle (0.1% DMSO) or 0.16 $\mu$ M, 0.63 $\mu$ M, 2.5 $\mu$ M, or 10.0 $\mu$ M concentrations of inhibitor followed by 3 days of treatment with 10ng/ml IL-4. WCLs were analyzed for argl and GAPDH (as a loading control) by Western blotting. Titrations were performed for the PI3Kp110 $\delta$  catalytic subunit inhibitors: SW18 (A), SW30 (B), SW14 (C) and the PI3Kp110 $\beta$  catalytic subunit inhibitor, TGX221 (C).

Supplemental Figure 1

Weisser *et al.*, 2010
